# Supplementary material for: FK866 Protects Human Dental Pulp Cells against Oxidative Stress-Induced Cellular Senescence
Source: Antioxidants (Basel). 2021 Feb 10;10(2):271. doi: 10.3390/antiox10020271 (PMC7916510; doi:10.3390/antiox10020271)
Supplement: Supplementary file 1 [file antioxidants-10-00271-s001.pdf]

## Supplementary data

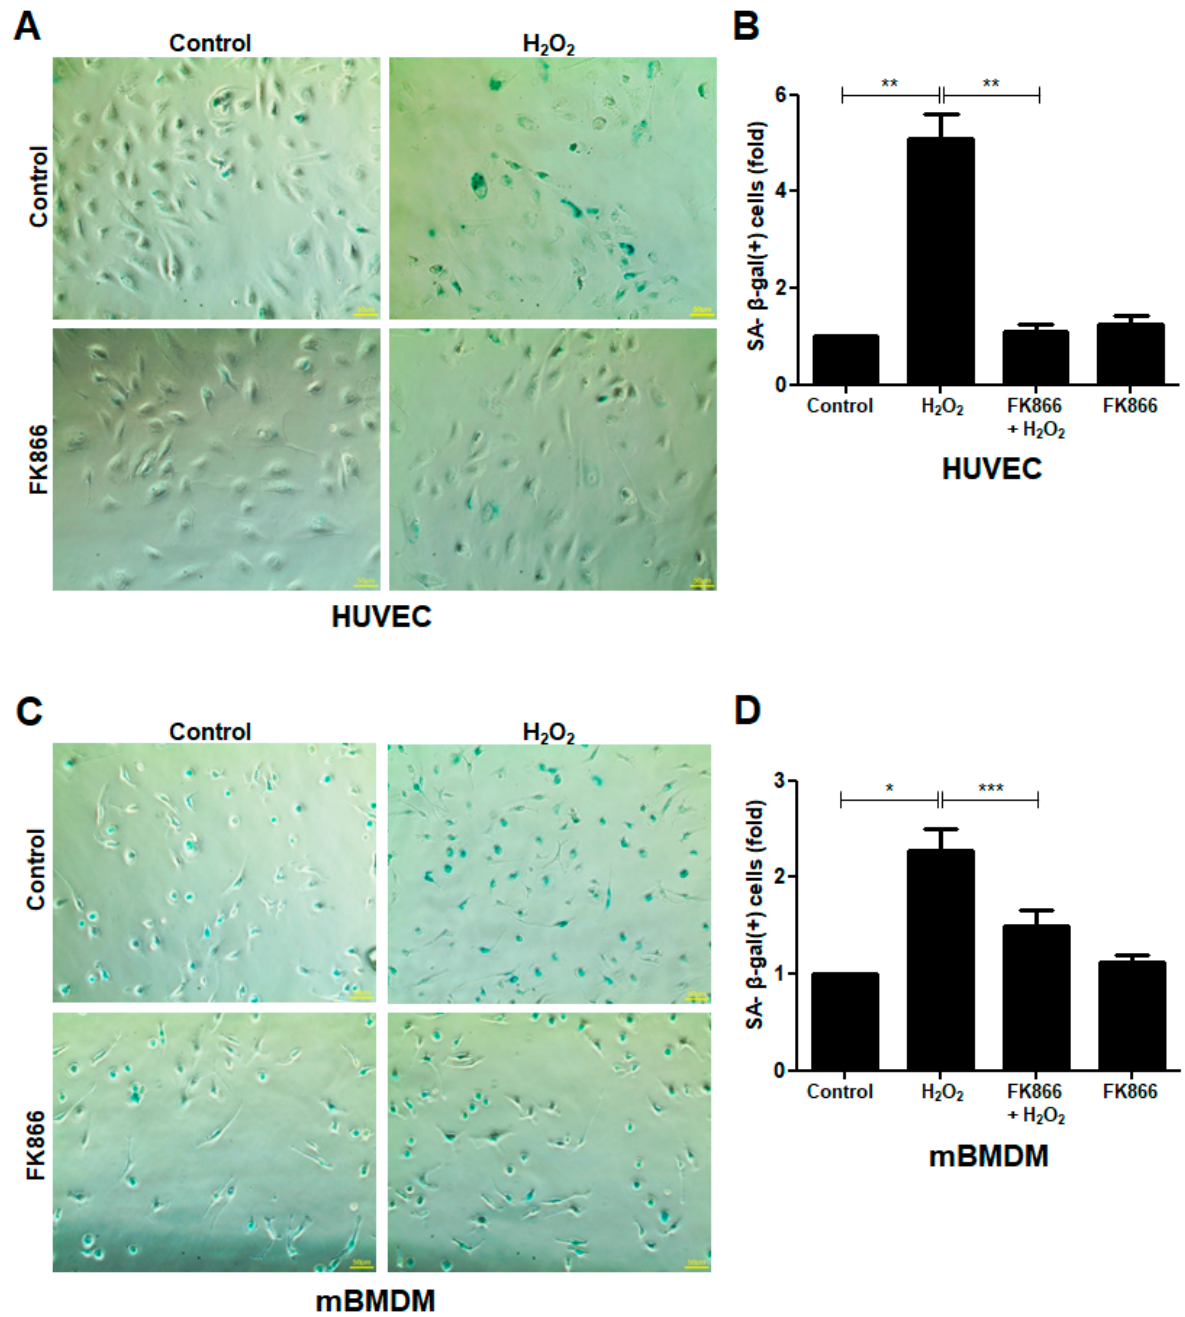

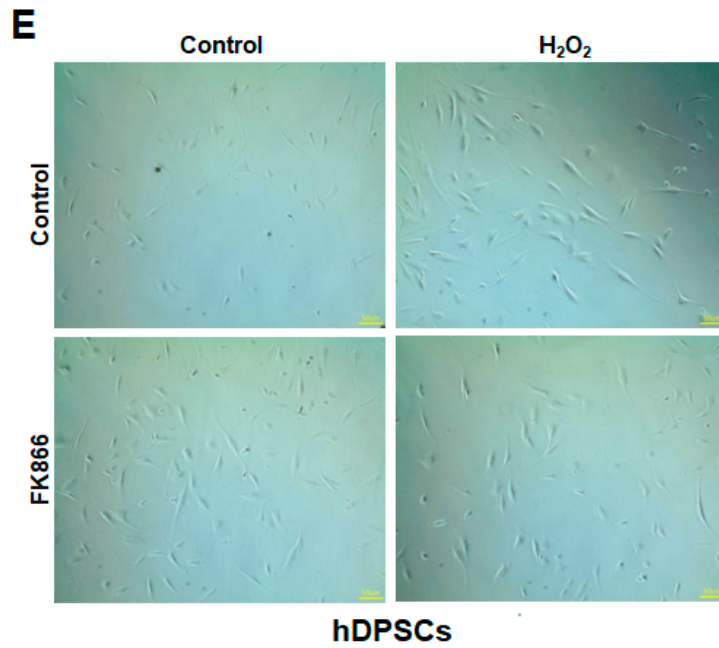

**Figure S1.** Effect of FK866 on H<sub>2</sub>O<sub>2</sub>-induced premature senescence in HUVEC (A,B), mBMDM (C,D), and hDPSCs (E). Cells were stimulated with H<sub>2</sub>O<sub>2</sub> (400 nM) for 24 h and stained for detecting the activity of senescence-associated (SA)- $\beta$ -galactosidase. (A,C,E) Representative image of SA- $\beta$ -galactosidase staining. (B,D) Quantitative results for the percentage of cells stained positively with SA- $\beta$ -galactosidase. Scale bar: 50  $\mu$ m. \* $p$  < 0.1, \*\* $p$  < 0.01, \*\*\* $p$  < 0.001.

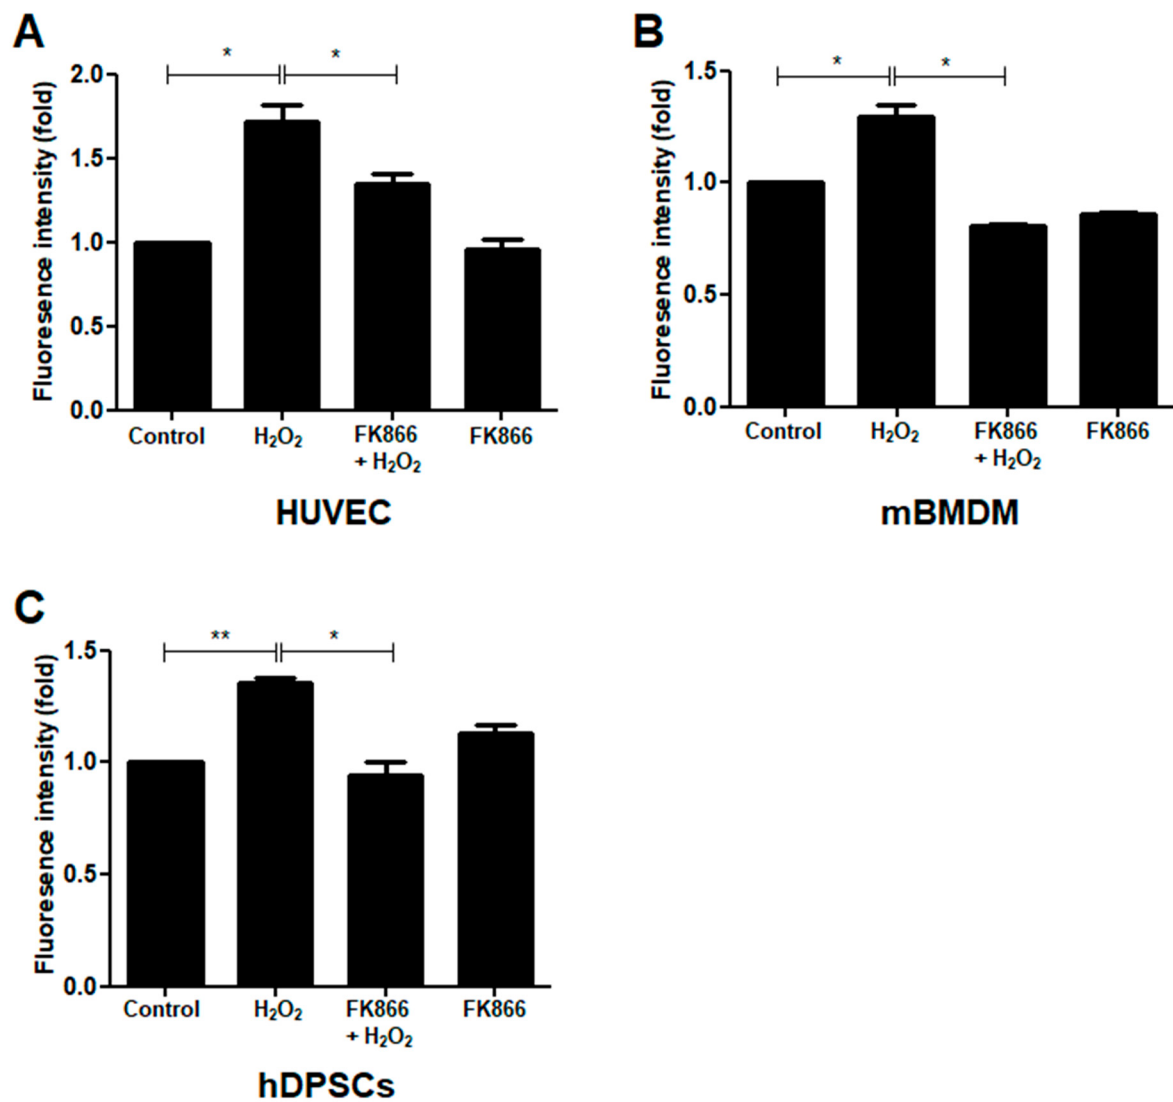

**Figure S2.** Effect of FK866 on H<sub>2</sub>O<sub>2</sub>-induced ROS production in HUVEC (A), mBMDM (B), and hDPSCs (C). Cells were pretreated with or without FK866 (10  $\mu$ M) for 2 h and then stimulated with H<sub>2</sub>O<sub>2</sub> (400 nM) for 24 h. Measurement of the total intracellular ROS levels in H<sub>2</sub>O<sub>2</sub>-treated cells with or without FK866 pretreatment using a fluorescent microplate reader. \* $p$  < 0.1, \*\* $p$  < 0.01.
